# Supplementary material for: Self-assembly of flower-like γ-AlOOH and γ-Al2O3 with hierarchical nanoarchitectures and enhanced adsorption performance towards methyl orange
Source: Royal Society of Chemistry journal article supplement (doi:10.1039/c4ra05343e), 2014-01-01
Supplement: c4ra05343e1.pdf [file c4ra05343e1.pdf]

Supporting information

## Self-Assembly of Flower-like $\gamma$ -AlOOH and $\gamma$ -Al<sub>2</sub>O<sub>3</sub> with Hierarchical Nanoarchitectures and Enhanced Adsorption Performance towards Methyl Orange

Jinchun Xiao<sup>a,b</sup>, Honghai Ji<sup>b</sup>, Zhiqi Shen<sup>b</sup>, Weiya Yang<sup>b</sup>, Changyou Guo<sup>b</sup>, Shaojun Wang<sup>b</sup>, Xiwen Zhang<sup>b</sup>, Rong Fu<sup>a,b</sup> and Fengxiang Ling<sup>b\*</sup>

Supporting information

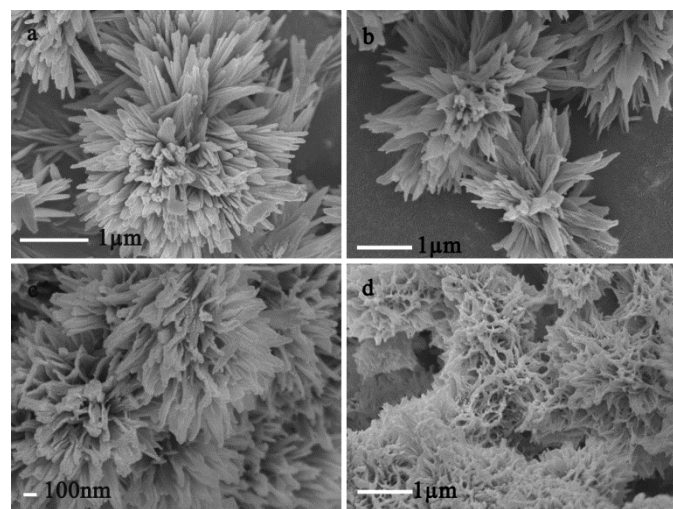

Fig.S1. SEM images of  $\gamma$ -AlOOH obtained before the calcination of the corresponding Sam.5 (a), Sam.6 (b), Sam.1 (c), Sam.7 (d).

Table S1. BET surface area, BJH-pore volume and average pore size of the  $\gamma$ -AlOOH and  $\gamma$ -Al<sub>2</sub>O<sub>3</sub>.

| Sample | S <sub>BET</sub><br>(m <sup>2</sup> /g) | Pore volume<br>(cm <sup>3</sup> /g) | Average pore size<br>(nm) |
|--------|-----------------------------------------|-------------------------------------|---------------------------|
| a      | 186                                     | 0.31                                | 8.6                       |
| b      | 206                                     | 0.40                                | 8.1                       |
| c      | 242                                     | 0.43                                | 7.8                       |
| d      | 260                                     | 0.49                                | 7.3                       |
| e      | 262                                     | 0.50                                | 7.9                       |
| f      | 396                                     | 0.87                                | 7.4                       |

a,  $\gamma$ -AlOOH obtained before calcination of the Sam.1; b,  $\gamma$ -Al<sub>2</sub>O<sub>3</sub> (Sam.5); c,  $\gamma$ -Al<sub>2</sub>O<sub>3</sub> (Sam.6); d,  $\gamma$ -Al<sub>2</sub>O<sub>3</sub> (Sam.1); e,  $\gamma$ -Al<sub>2</sub>O<sub>3</sub> (Sam.7); f, commercial  $\gamma$ -Al<sub>2</sub>O<sub>3</sub>.

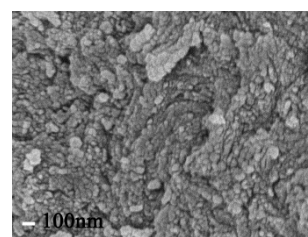

Fig.S2 SEM image of the Sam.8.

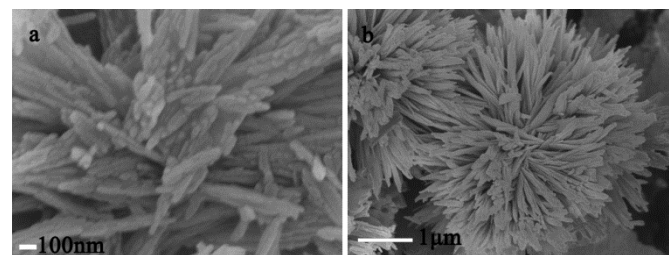

Fig.S3. Morphology evolution of the samples prepared at different reaction stages at  $R_{UAl}=1.5$ ,  $V_{p123}=5$  and 150 °C for (a) 8 h and (b) 20 h.
